# Supplementary material for: The Mechanism of Transcription Factor Swi6 in Regulating Growth and Pathogenicity of Ceratocystis fimbriata: Insights from Non-Targeted Metabolomics
Source: MDPI journal article supplement (doi:10.3390/microorganisms11112666), 2023-10-30
Supplement: s1 [file s1]

Table S1. Mobile phase elution gradient in LC-MS

Table S1a. Mobile phase elution gradient in positive ion mode

| Time (min) | Flow rate (mL/min) | A (%) | B (%) |
|------------|--------------------|-------|-------|
| 0          | 0.4                | 100   | 0     |
| 3          | 0.4                | 80    | 20    |
| 4.5        | 0.4                | 65    | 35    |
| 5          | 0.4                | 0     | 100   |
| 6.3        | 0.4                | 0     | 100   |
| 6.4        | 0.4                | 100   | 0     |
| 8          | 0.4                | 100   | 0     |

Table S1b. Mobile phase elution gradient in negative ion mode

| Time (min) | Flow rate (mL/min) | A (%) | B (%) |
|------------|--------------------|-------|-------|
| 0          | 0.4                | 100   | 0     |
| 1.5        | 0.4                | 95    | 5     |
| 2          | 0.4                | 90    | 10    |
| 4.5        | 0.4                | 70    | 30    |
| 5          | 0.4                | 0     | 100   |
| 6.3        | 0.4                | 0     | 100   |
| 6.4        | 0.4                | 100   | 0     |
| 8          | 0.4                | 100   | 0     |

Note: Mobile phase A consists of 95% water + 5% acetonitrile (containing 0.1% formic acid), while mobile phase B consists of 47.5% acetonitrile + 47.5% isopropanol + 5% water (containing 0.1% formic acid).
